# Supplementary material for: Role of Horizontal Gene Transfer in the Development of Multidrug Resistance in Haemophilus influenzae
Source: PubMed Central journal article supplement (PMC6992377; doi:10.1128/msphere.00969-19), 2020-01-29
Supplement: mSphere.00969-19-sf002.pdf [file mSphere.00969-19-sf002.pdf]

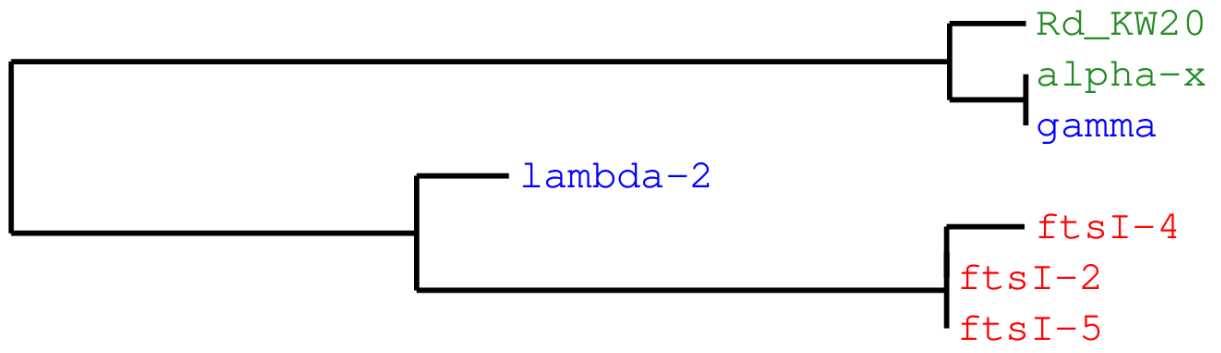

0.02
