# Supplementary material for: Role of Horizontal Gene Transfer in the Development of Multidrug Resistance in Haemophilus influenzae
Source: PubMed Central journal article supplement (PMC6992377; doi:10.1128/msphere.00969-19), 2020-01-29
Supplement: mSphere.00969-19-sf003.pdf [file mSphere.00969-19-sf003.pdf]

|                 |        |                                                                                                           |     |           |
|-----------------|--------|-----------------------------------------------------------------------------------------------------------|-----|-----------|
|                 | ID%    | ---USS---                                                                                                 | 350 | 357       |
| Rd_KW20         | 100.0% | <b>ACCGCACTT</b> CAACGAGGTGTAGTTAAACGAGATGAAATTATTGATAC <b>TAC</b> CGTCCTTTAAATTAAGCGGTA                  |     |           |
| <i>alpha-x</i>  | 99.3%  | <b>ACCGCACTT</b> CAACGAGGTGTAGTTAAACGAGATGAAATTATTGATAC <b>TAC</b> CGTCCTTTAAATTAAGCGGTA                  |     |           |
| <i>gamma</i>    | 99.3%  | <b>ACCGCACTT</b> CAACGAGGTGTAGTTAAACGAGATGAAATTATTGATAC <b>TAC</b> CGTCCTTTAAATTAAGCGGTA                  |     |           |
| <i>lambda-2</i> | 93.4%  | <b>ACCGCACTT</b> CAACGAGGTGT <b>CGTTAAAC</b> GAGATGAAATTATT <b>AAT</b> ACCACGTCCTTTAAATTAAGCGG <b>CA</b>  |     |           |
| <i>ftsI-2</i>   | 91.7%  | <b>ACCGCACTT</b> CAACGAGGTGT <b>CGTTAAAC</b> GAGATGAAATTATT <b>AAT</b> ACCACGTCCTTTAAATTA <b>AAC</b> GGTA |     |           |
| <i>ftsI-5</i>   | 91.7%  | <b>ACCGCACTT</b> CAACGAGGTGT <b>CGTTAAAC</b> GAGATGAAATTATT <b>AAT</b> ACCACGTCCTTTAAATTA <b>AAC</b> GGTA |     |           |
| <i>ftsI-4</i>   | 91.4%  | <b>ACCGCACTT</b> CAACGAGGTGT <b>CGTTAAAC</b> GAGATGAAATTATT <b>AAT</b> ACCACGTCCTTTAAATTA <b>AAC</b> GGTA |     |           |
|                 | ID%    |                                                                                                           | 377 | ---SSN--- |
| Rd_KW20         | 100.0% | AAGAAATTGTGGAC <b>GTTCACCA</b> CGTG <b>CTCAGCAA</b> CTTTAGACGAGATTTTAAATGAAC <b>TCTAGTAACCG</b>           |     |           |
| <i>alpha-x</i>  | 99.3%  | AAGAAATTGTGGAC <b>GTTCACCA</b> CGTG <b>CTCAGCAA</b> CTTTAGACGAGATTTTAAATGAAC <b>TCTAGTAACCG</b>           |     |           |
| <i>gamma</i>    | 99.3%  | AAGAAATTGTGGAC <b>GTTCACCA</b> CGTG <b>CTCAGCAA</b> CTTTAGACGAGATTTTAAATGAAC <b>TCTAGTAACCG</b>           |     |           |
| <i>lambda-2</i> | 93.4%  | AAGAAATTGTGGAC <b>GTTCACCT</b> CGCG <b>CACAACAA</b> CTTTAGATGAGATTTTAA <b>ATT</b> AA <b>TCTAGTAACCG</b>   |     |           |
| <i>ftsI-2</i>   | 91.7%  | AAGAAATTGTGGAC <b>GTTCACCT</b> CGCG <b>CACAACAA</b> CTTTAGATGAGATTTTAA <b>ATT</b> AA <b>TCAAGTAACCG</b>   |     |           |
| <i>ftsI-5</i>   | 91.7%  | AAGAAATTGTGGAC <b>GTTCACCT</b> CGCG <b>CACAACAA</b> CTTTAGATGAGATTTTAA <b>ATT</b> AA <b>TCAAGTAACCG</b>   |     |           |
| <i>ftsI-4</i>   | 91.4%  | AAGAAATTGTGGAT <b>GTTCACCT</b> CGCG <b>CACAACAA</b> CTTTAGATGAGATTTTAA <b>ATT</b> AA <b>TCAAGTAACCG</b>   |     |           |
|                 | ID%    | 385                                                                                                       | 389 |           |
| Rd_KW20         | 100.0% | TGGTGTAAAGTCG <b>CTTGCATT</b> ACGTATGCCACCTAGTGCATTAATGGAAAC <b>TTATCAAAA</b> TGCAGGTTTA                  |     |           |
| <i>alpha-x</i>  | 99.3%  | TGGTGTAAAGTCG <b>CTTGCATT</b> ACGTATGCCACCTAGTGCATTAATGGAAAC <b>TTATCAAAA</b> TGCAGGTTTA                  |     |           |
| <i>gamma</i>    | 99.3%  | TGGTGTAAAGTCG <b>CTTGCATT</b> ACGTATGCCACCTAGTGCATTAATGGAAAC <b>TTATCAAAA</b> TGCAGGTTTA                  |     |           |
| <i>lambda-2</i> | 93.4%  | TGGTGTGAGTCG <b>CCTTGCATT</b> GCCTATGCCACCTAGTGCATTGATGGAAAC <b>TTATCAAAA</b> TGCAGGTTTA                  |     |           |
| <i>ftsI-2</i>   | 91.7%  | TGGTGTG <b>ACT</b> CG <b>CCTTGCATT</b> CGTATGCCACCAAGTGCATTGATGGAAAC <b>TTATCAAAA</b> TGCAGGTTTA          |     |           |
| <i>ftsI-5</i>   | 91.7%  | TGGTGTG <b>ACT</b> CG <b>CCTTGCATT</b> CGTATGCCACCAAGTGCATTGATGGAAAC <b>TTATCAAAA</b> TGCAGGTTTA          |     |           |
| <i>ftsI-4</i>   | 91.4%  | TGGTGTG <b>ACT</b> CG <b>CCTTGCATT</b> CGTATGCCACCAAGTGCATTGATGGAAAC <b>TTATCAAAA</b> TGCAGGTTTA          |     |           |
|                 | ID%    |                                                                                                           |     |           |
| Rd_KW20         | 100.0% | AGTAAACCGACAGATTTAGGCTTGATCGGAGAGCAAGTTGGGATTTTGAATGCAAA <b>TCGTAAAC</b> CGCTGGG                          |     |           |
| <i>alpha-x</i>  | 99.3%  | AGTAAACCGACAGATTTAGGCTTGATCGGAGAGCAAGTTGGGATTTTGAATGCAAA <b>TCGTAAAC</b> CGCTGGG                          |     |           |
| <i>gamma</i>    | 99.3%  | AGTAAACCGACAGATTTAGGCTTGATCGGAGAGCAAGTTGGGATTTTGAATGCAAA <b>TCGTAAAC</b> CGCTGGG                          |     |           |
| <i>lambda-2</i> | 93.4%  | AGTAAACCGACAGATTTAGGCTTGATCGGAGAGCAAGTTGGGATTTTGAATGCAAA <b>TCGTAAAC</b> CGCTGGG                          |     |           |
| <i>ftsI-2</i>   | 91.7%  | AGTAAACCGACAGATTTAGGCTTGATCGGAGAGCAAGTTGGGATTTTGAATGCAAA <b>TCGTAAAC</b> CGCTGGG                          |     |           |
| <i>ftsI-5</i>   | 91.7%  | AGTAAACCGACAGATTTAGGCTTGATCGGAGAGCAAGTTGGGATTTTGAATGCAAA <b>TCGTAAAC</b> CGCTGGG                          |     |           |
| <i>ftsI-4</i>   | 91.4%  | AGTAAACCGACAGATTTAGGCTTGATCGGAGAGCAAGTTGGGATTTTGAATGCAAA <b>TCGTAAAC</b> CGCTGGG                          |     |           |
|                 | ID%    |                                                                                                           |     |           |
| Rd_KW20         | 100.0% | CAGATATTGA                                                                                                |     |           |
| <i>alpha-x</i>  | 99.3%  | CAGATATTGA                                                                                                |     |           |
| <i>gamma</i>    | 99.3%  | CAGATATTGA                                                                                                |     |           |
| <i>lambda-2</i> | 93.4%  | CAGATATTGA                                                                                                |     |           |
| <i>ftsI-2</i>   | 91.7%  | CAGATATTGA                                                                                                |     |           |
| <i>ftsI-5</i>   | 91.7%  | CAGATATTGA                                                                                                |     |           |
| <i>ftsI-4</i>   | 91.4%  | CAGATATTGA                                                                                                |     |           |
